# Supplementary material for: Modeling Soil-Facing Interface Interaction With Continuum Element Methodology
Source: Frontiers journal article supplement (doi:10.3389/fbuil.2022.842495), 2022-03-11
Supplement: Image_4.pdf [file Image_4.pdf]

a) Unstructured-triangle/irregular mesh:

$q = 50$  kPa

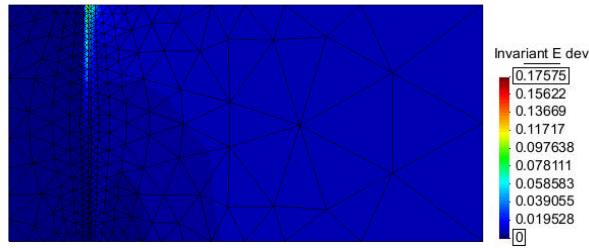

$q = 100$  kPa

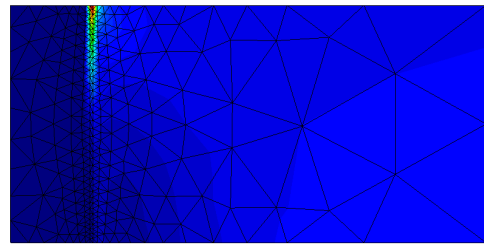

b) Structured-triangle/fine mesh:

$q = 50$  kPa

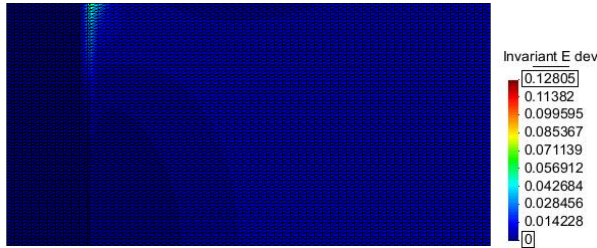

$q = 100$  kPa

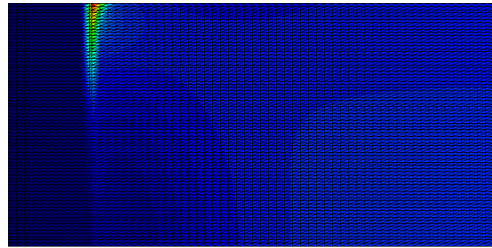

c) Structured-quadrilateral/fine mesh:

$q = 50$  kPa

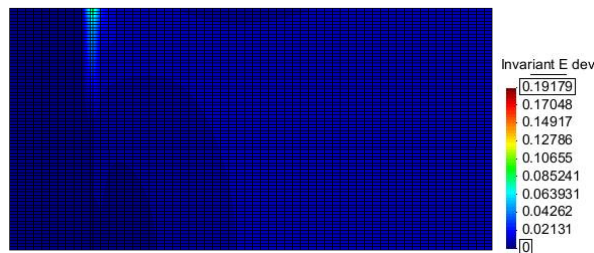

$q = 100$  kPa

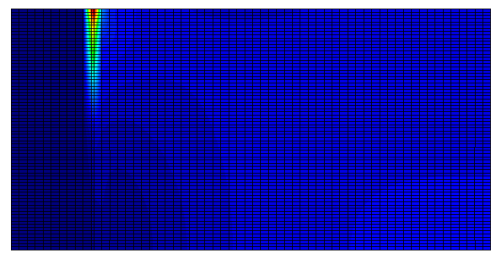

d) Structured-quadrilateral/coarse mesh:

$q = 50$  kPa

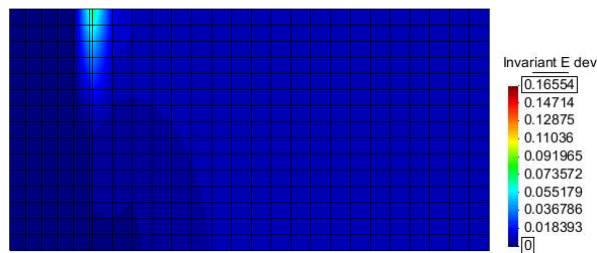

$q = 100$  kPa

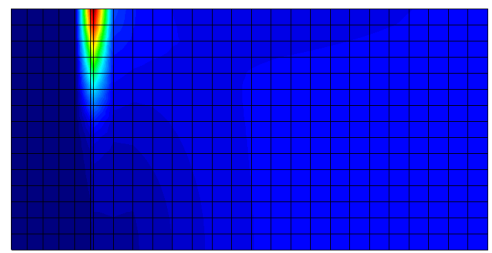

**Figure S4:** Evolution of total shear strains using program CODE\_BRIGHT ( $q = 50$  kPa and 100 kPa) with the different meshes assumed: (a) unstructured mesh with triangular elements, (b) triangular structured-mesh, (c), quadrilateral structured-fine-mesh, and (d) quadrilateral structured-coarse-mesh. Cases with  $t_i = 0.018$ m and  $R_i = 0.8$ .
