# Supplementary material for: Modeling Soil-Facing Interface Interaction With Continuum Element Methodology
Source: Frontiers journal article supplement (doi:10.3389/fbuil.2022.842495), 2022-03-11
Supplement: Image_8.pdf [file Image_8.pdf]

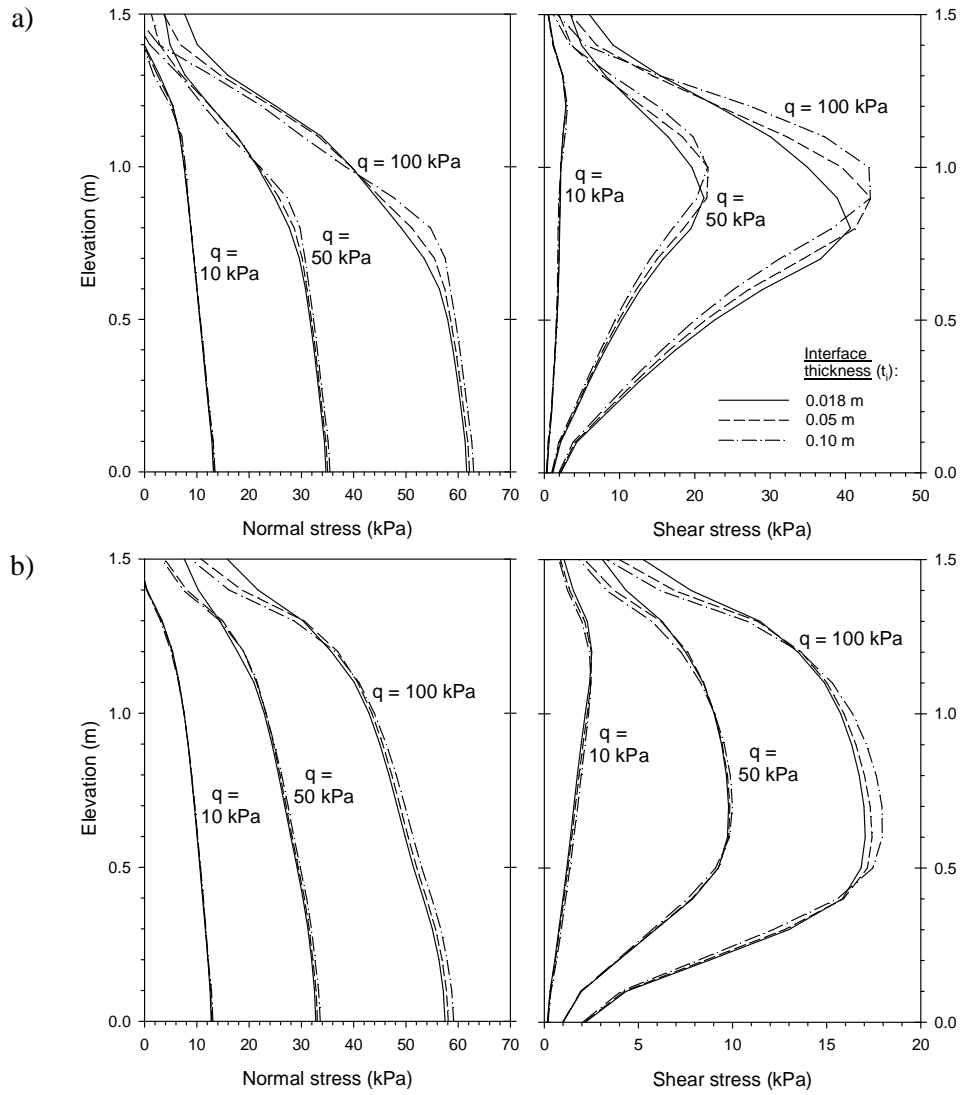

**Figure S8:** Load transfer from backfill soil to facing panel using program CODE\_BRIGHT: Comparison of normal and shear stresses using different interface thickness ( $t_i = 0.018$  m,  $0.05$  m, and  $0.10$  m): Cross-section at the middle of the interface thickness (i.e.,  $x = 0.509$  for  $t_i = 0.018$  m;  $x = 0.525$  for  $t_i = 0.05$  m; and  $x = 0.55$  for  $t_i = 0.1$  m). Cases with (a)  $R_i = 0.8$ , and (b)  $R_i = 0.3$ .
